# Supplementary material for: The Clinical Utility of D-Dimer and Prothrombin Fragment (F1+2) for Peripheral Artery Disease: A Prospective Study
Source: MDPI journal article supplement (doi:10.3390/biomedicines10040878), 2022-04-11
Supplement: s1 [file s1]

## Supplementary Materials

**Table S1.** Baseline protein levels between the PAD and non-PAD control group.

| Proteins (at Baseline) | Non-PAD ( <i>n</i> = 43) | PAD ( <i>n</i> = 163) | <i>p</i> |
|------------------------|--------------------------|-----------------------|----------|
| F1+2 (nmol/mL)         | 1.84 (1.17–3.09)         | 3.60 (2.30–4.74)      | 0.001    |
| D-dimer (µg/mL)        | 0.696 (0.298–1.20)       | 1.34 (0.817–2.27)     | 0.001    |

**Table S2.** Vascular outcomes as cumulative incidences (proportion of patients experiencing an event) and incidence rates (events/100 person-years [PYs]).

| Vascular Events                | OVERALL<br>Events/100PYs | NON-PAD<br>Events/100PYs | PAD<br>Events/100PYs |
|--------------------------------|--------------------------|--------------------------|----------------------|
| Change in ABI ( $\geq -0.15$ ) | 12.86                    | 5.81                     | 14.72                |
| Arterial Intervention          | 6.07                     | 0.00                     | 7.67                 |
| Major Limb Amputation          | 1.21                     | 0.00                     | 1.53                 |
| MALE                           | 7.04                     | 0.00                     | 8.90                 |
